# Supplementary material
Source: PubMed Central journal article supplement (PMC4513664)
Supplement: NIHMS708850-supplement-Supplementary_data.pdf [file NIHMS708850-supplement-Supplementary_data.pdf]

## SUPPLEMENTARY INFORMATION

### Development of prediction model

Before applying the prognostic classification algorithms, gene expression data used as training and test sets were normalized by centralizing the gene expression level across the tissues. Gene symbols were used to match orthologous genes between human and mouse. To stratify HCC patients according to mouse SOH gene expression signature, we applied a classification algorithm based on Bayesian compound covariate predictor (BCCP) as described below.

To generate the probability of silence of Hippo pathway in each patient with HCC, expression data in the mouse SOH signature (training set, **Fig. 1B**) were used to build a classifier based on the Bayesian compound covariate predictor (BCCP) algorithm.<sup>1</sup> The paragraphs below describe the classifier development algorithms that were applied in training and test sets.

Let  $t_j$  denote the t statistic for gene  $j$  for comparing class 1 (SOH) to class 2 (AH) in the training set.

$$t_j = \frac{\bar{x}_j^{(1)} - \bar{x}_j^{(2)}}{s_j \sqrt{1/n_1 + 1/n_2}} \quad (1)$$

where  $\bar{x}_j^{(m)}$  denotes the mean of log expression  $j$  for training samples in class  $m$  ( $m=1,2$ ),  $s_j$  is an estimate of the intra-class variance for gene  $j$ , and  $n_m$  is the number of cases in the training set in class  $m$  ( $m=1,2$ ).

Let  $x_{ij}$  denote the log expression for gene  $j$  in sample  $i$  of the training set. For each sample of the training set, the compound covariate value is computed as follows:

$$C_i = \sum_{j \in \text{Selected}} t_j x_{ij} \quad (2)$$

Let  $\bar{C}^{(1)}$  denote the mean of the  $C_i$  values for samples in class 1 in the training set and let  $\bar{C}^{(2)}$  denote the mean for samples in class 2 of the training set.

The compound covariate for sample  $y$  in test set is defined by the following:

$$C = \sum_{j \in \text{Selected}} t_j y_j \quad (3)$$

To classify a case not in the training set with log expression values  $Y = (y_1, y_2, \dots, y_p)$ , the compound covariate value  $C$  is computed using expression (3). The probability that the sample  $Y$  came from class 1 is estimated as

$$\Pr[Y \text{ in class 1}] = \frac{\phi(C; \bar{C}^{(1)}, V) \pi_1}{\phi(C; \bar{C}^{(1)}, V) \pi_1 + \phi(C; \bar{C}^{(2)}, V) (1 - \pi_1)} \quad (4)$$

where  $\phi(C; \bar{C}^{(1)}, V)$  denotes the Gaussian density of a value  $C$  when the mean is  $\bar{C}^{(1)}$  and the variance is  $V$ .  $\pi_1$  denotes equal prior probability that the class is 1 (0.5).

In equation (4),

$$\bar{C}^{(1)} = \sum_{j \text{ in class 1}} C_j, \bar{C}^{(2)} = \sum_{j \text{ in class 2}} C_j$$

$$\text{Gaussian Density } \phi(C; \bar{C}^{(1)}, V) = \frac{1}{\sqrt{2\pi V}} \exp\left(-\frac{(C - \bar{C}^{(1)})^2}{2V}\right)$$

$$V = \frac{\sum_{j \text{ in Class 1}} (C_j - \bar{C}^{(1)})^2 + \sum_{j \text{ in Class 2}} (C_j - \bar{C}^{(2)})^2}{n_1 + n_2 - 2}$$

The probability that the new sample Y is from class 2 is 1 minus the value given in (4). The class with the greater computed probability is predicted for the new sample. The Bayesian compound covariate method was developed by Wright et al.<sup>2</sup>

The trained BCCP was applied to gene expression data of the NCI cohort (test set 1), and a probability of SOH was generated for each patient. SOH probabilities ranged from 0.888 to 0.127 among all HCC patients in the NCI cohort and were significantly associated with overall survival (OS) (hazard ratio [HR], 10.6; 95% confidence interval [CI], 3.0 – 37.2;  $P = 2.3 \times 10^{-4}$ ) and recurrence-free survival (RFS) (HR, 9.8; 95% CI, 1.6 – 61.5;  $P = 0.01$ ) as a continuous prediction value.

We next carried out receiver operating characteristic (ROC) plotting to identify an optimal threshold of SOH probability that would best discriminate high-risk patients from low-risk patients for 3-year recurrence by using data from NCI cohort. According to the Youden indices,<sup>3</sup> optimal threshold value was 0.65. ROC analysis was performed by pROC package in R.<sup>4</sup>

## Reference

1. Radmacher MD, McShane LM, Simon R. A paradigm for class prediction using gene expression profiles. *J Comput Biol* 2002;9(3):505-511.
2. Wright G, Tan B, Rosenwald A, Hurt EH, Wiestner A, Staudt LM. A gene expression-based method to diagnose clinically distinct subgroups of diffuse large B cell lymphoma. *Proc Natl Acad Sci U S A* 2003 Aug;100(17):9991-9996.
3. YOUTDEN WJ. Index for rating diagnostic tests. *Cancer* 1950 Jan;3(1):32-35.
4. Robin X, Turck N, Hainard A, Tiberti N, Lisacek F, Sanchez JC, et al. pROC: an open-source package for R and S+ to analyze and compare ROC curves. *BMC Bioinformatics* 2011 Mar 17;12:77. doi: 10.1186/1471-2105-12-77.:77-12.

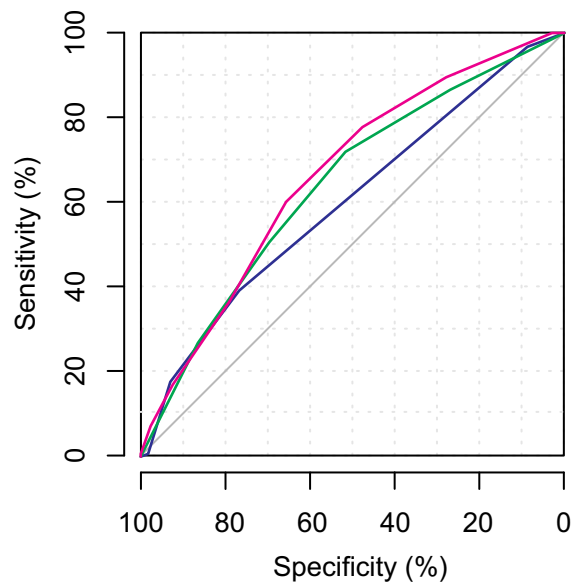

|            | AUC   | 95% CI        | P-values             |
|------------|-------|---------------|----------------------|
| BCLC       | 0.599 | 0.547 - 0.646 | $1.6 \times 10^{-4}$ |
| SOH        | 0.641 | 0.582 - 0.693 | $2.1 \times 10^{-5}$ |
| BCLC + SOH | 0.663 | 0.61 - 0.713  | $1.0 \times 10^{-6}$ |

**Supplementary Figure 1** Comparison of ROC curves of different prognosis models for HCC.

Prognostic significance of each model was estimated by AUC from ROC analysis for 3-year recurrence free survival. Patients were quintile-stratified for Bayesian compound covariate predictor probability of SOH. AUC, area under curve; CI, confidence interval of AUC; BCLC, Barcelona Clinic Liver Cancer stage; SOH, silence of Hippo subtype.

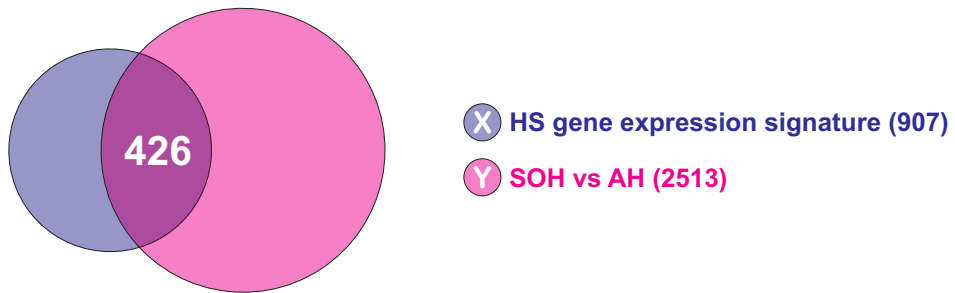

**Supplementary Figure 2 Venn diagram of gene lists from two different gene expression signatures**

The blue circle (gene list X) represents genes from the previously identified HS signature from the NCI cohort. The magenta circle (gene list Y) represents genes differentially expressed between silence of Hippo (SOH) subtype and active Hippo (AH) subtype in the NCI cohort ( $P < 0.001$ , 2513 gene features). Of 907 genes in the HS signature, 426 genes (47%) were present in the gene list specific to SOH subtype in the NCI cohort.

**Supplementary Table 1. Genes in SOH signature**

| <b>Probe ID</b> | <b>Symbol</b> | <b>ENTREZ_ID</b> | <b>t-value</b> |
|-----------------|---------------|------------------|----------------|
| ILMN_1212836    | Ptprc         | 19264            | 2.765          |
| ILMN_1213708    | 4732462B05Rik |                  | -0.988         |
| ILMN_1213958    | Sec23a        | 20334            | -2.799         |
| ILMN_1214118    | Plekha2       | 83436            | 3.511          |
| ILMN_1214498    | Cyp2d22       | 56448            | -5.185         |
| ILMN_1214838    | Hsd3b2        | 15493            | -4.724         |
| ILMN_1214918    | LOC546015     | 546015           | 4.227          |
| ILMN_1215124    | Klhl13        | 67455            | 4.777          |
| ILMN_1215212    | Rhob          | 11852            | 4.395          |
| ILMN_1215305    | Kat2b         | 18519            | -3.056         |
| ILMN_1215791    | Alox5ap       |                  | 0.922          |
| ILMN_1215807    | Glipr1        | 73690            | 4.099          |
| ILMN_1216409    | 1500012F01Rik | 68949            | 4.135          |
| ILMN_1216764    | Ier3          | 15937            | 5.91           |
| ILMN_1216880    | Emr1          | 13733            | 0.807          |
| ILMN_1217180    | Ifitm1        | 68713            | -0.088         |
| ILMN_1217280    | 4930528F23Rik | 75178            | -3.528         |
| ILMN_1217389    | Pkib          | 18768            | 1.358          |
| ILMN_1217849    | Laptm5        | 16792            | 2.564          |
| ILMN_1218592    | Tes           | 21753            | 5.254          |
| ILMN_1218681    | Cp            |                  | 3.166          |
| ILMN_1218799    | Emb           | 13723            | 2.119          |
| ILMN_1219016    | Wwtr1         | 97064            | 5.265          |
| ILMN_1219298    | Art4          | 109978           | -1.141         |
| ILMN_1219583    | Capn2         | 12334            | -1.062         |
| ILMN_1219820    | 1200002N14Rik | 71712            | 2.558          |
| ILMN_1219904    | Tspan33       | 232670           | -3.093         |
| ILMN_1220121    | Kif23         |                  | 4.716          |
| ILMN_1220261    | Tspan8        | 216350           | 3.752          |
| ILMN_1220939    | Epb4.1l4a     |                  | 3.152          |
| ILMN_1220974    | B3galnt2      | 97884            | -3.186         |
| ILMN_1221102    | Arl5a         | 75423            | -2.991         |
| ILMN_1221157    | Krt8          | 16691            | 5.37           |
| ILMN_1221290    | LOC636952     | 636952           | 4.148          |
| ILMN_1221817    | Cd74          | 16149            | 4.227          |
| ILMN_1222246    | Adfp          | 11520            | -3.438         |
| ILMN_1222269    | 1810011H11Rik | 69069            | 1.708          |
| ILMN_1222500    | LOC100047162  | 1E+08            | 0.952          |
| ILMN_1222860    | Gm5150        | 381484           | -0.964         |
| ILMN_1223041    | Abi3          |                  | 1.164          |

|              |              |        |        |
|--------------|--------------|--------|--------|
| ILMN_1223257 | Ccl4         | 20303  | 4.102  |
| ILMN_1223285 | Hspa2        | 15512  | 3.52   |
| ILMN_1223317 | Lgals3       | 16854  | 3.699  |
| ILMN_1223552 | Fbn1         |        | 3.048  |
| ILMN_1223949 | Cldn4        | 12740  | 1.588  |
| ILMN_1223999 | LOC381222    |        | -5.605 |
| ILMN_1224635 | Fkbp11       | 66120  | 5.185  |
| ILMN_1224719 | LOC665032    | 665032 | 3.416  |
| ILMN_1224754 | Ckb          | 12709  | 0.841  |
| ILMN_1224768 | Ehd4         | 98878  | 5.427  |
| ILMN_1224855 | Samd9l       | 209086 | 2.918  |
| ILMN_1225535 | Ganab        | 14376  | -3.987 |
| ILMN_1225985 | Serpina7     | 331535 | 1.62   |
| ILMN_1226455 | Ftcd         | 14317  | -5.603 |
| ILMN_1226525 | H2-Ab1       | 14961  | 3.986  |
| ILMN_1226829 | Cd93         | 17064  | 4.42   |
| ILMN_1226978 | Pex5         |        | -3.956 |
| ILMN_1227111 | LOC240549    |        | -3.749 |
| ILMN_1227573 | Irf7         | 54123  | -0.296 |
| ILMN_1227831 | Trfr2        | 50765  | -4.738 |
| ILMN_1227875 | Fkbp7        | 14231  | 1.542  |
| ILMN_1227907 | Gmfg         | 63986  | 0.457  |
| ILMN_1228213 | Ifi30        | 65972  | 1.35   |
| ILMN_1228474 | Ctsj         | 26898  | -0.422 |
| ILMN_1228535 | Pmp22        | 18858  | -0.558 |
| ILMN_1228948 | Ugt1a1       | 394436 | -5.064 |
| ILMN_1229082 | Klhl21       | 242785 | -2.891 |
| ILMN_1229577 | Sstr2        |        | 5.309  |
| ILMN_1229667 | Slc43a1      | 72401  | -4.58  |
| ILMN_1230032 | EG384596     | 384596 | 3.475  |
| ILMN_1230119 | Gcap27       |        | 4.688  |
| ILMN_1230318 | Cbs          |        | -5.191 |
| ILMN_1230788 | Tle1         | 21885  | -2.716 |
| ILMN_1231012 | Lcp2         | 16822  | 1.233  |
| ILMN_1231513 | Tacstd2      | 56753  | 1.276  |
| ILMN_1231814 | Ccl5         | 20304  | 2.145  |
| ILMN_1231896 | Ssbp4        |        | 3.182  |
| ILMN_1232495 | LOC100044177 |        | 3.101  |
| ILMN_1232537 | Arl4c        | 320982 | 3      |
| ILMN_1232601 | Cyb561       | 13056  | 2.751  |
| ILMN_1232716 | Cyp1b1       | 13078  | 1.534  |
| ILMN_1232884 | Sphk1        | 20698  | 2.681  |
| ILMN_1232948 | Pnp          |        | -0.111 |

|              |                |        |        |
|--------------|----------------|--------|--------|
| ILMN_1232995 | 1810023F06Rik  | 217845 | 3.745  |
| ILMN_1233175 | LOC632667      | 632667 | 5.319  |
| ILMN_1233334 | Fpgs           | 14287  | -3.462 |
| ILMN_1233455 | Olfml3         | 99543  | 2.187  |
| ILMN_1234223 | Pld4           | 104759 | 0.479  |
| ILMN_1234773 | Anxa13         | 69787  | 0.261  |
| ILMN_1234824 | Ccdc80         | 67896  | 0.725  |
| ILMN_1235196 | Atp10d         | 231287 | 5.038  |
| ILMN_1235635 | Slco3a1        | 108116 | 4.54   |
| ILMN_1235932 | Pdgfra         | 18595  | -0.925 |
| ILMN_1236010 | scl0003799.1_2 |        | 5.315  |
| ILMN_1236354 | E130302P19Rik  |        | -4.235 |
| ILMN_1236757 | Oxct1          | 67041  | 3.826  |
| ILMN_1236758 | Wfdc2          | 67701  | 3.545  |
| ILMN_1237033 | LOC384710      | 384710 | 5.001  |
| ILMN_1237186 | Spint1         | 20732  | 4.373  |
| ILMN_1237886 | Enc1           | 13803  | 4.748  |
| ILMN_1238592 | Pigh           | 110417 | 4.94   |
| ILMN_1238597 | Omd            | 27047  | 1.721  |
| ILMN_1238603 | Pcolce2        | 76477  | -1.402 |
| ILMN_1238838 | LOC100045005   | 1E+08  | 4.258  |
| ILMN_1238874 | LOC100047759   | 1E+08  | 3.663  |
| ILMN_1239102 | H2-Eb1         | 14969  | 4.034  |
| ILMN_1239196 | 1700088E04Rik  | 27660  | 3.824  |
| ILMN_1239397 | LOC100047934   |        | 1.371  |
| ILMN_1239872 | LOC665792      | 665792 | -1.101 |
| ILMN_1240471 | Retsat         | 67442  | -3.305 |
| ILMN_1240624 | 1700011H14Rik  | 67082  | 3.137  |
| ILMN_1240864 | Tyki           |        | 2.133  |
| ILMN_1241171 | Anxa3          | 11745  | 3.635  |
| ILMN_1241695 | Ms4a6d         | 68774  | 3.185  |
| ILMN_1242999 | Avpr1a         | 54140  | -1.207 |
| ILMN_1243212 | Sparc          | 20692  | 3.567  |
| ILMN_1243433 | LOC100048037   |        | 4.186  |
| ILMN_1243507 | Spsb4          | 211949 | -0.702 |
| ILMN_1243616 | Cdkn3          | 72391  | 5.611  |
| ILMN_1243900 | LOC626152      | 626152 | 5.403  |
| ILMN_1244169 | Sftpd          | 20390  | 4.442  |
| ILMN_1244291 | Gja1           | 14609  | 2.088  |
| ILMN_1244536 | Hnrpa1         |        | 4.485  |
| ILMN_1244977 | H2-DMb1        | 14999  | 3.282  |
| ILMN_1245307 | Fbln2          | 14115  | 2.721  |
| ILMN_1245693 | A530020H22Rik  |        | -2.429 |

|              |               |        |        |
|--------------|---------------|--------|--------|
| ILMN_1245994 | Flna          | 192176 | 4.612  |
| ILMN_1246056 | Gngt2         | 14710  | -0.107 |
| ILMN_1246558 | Atad4         | 217138 | 4.552  |
| ILMN_1246573 | Calml4        |        | 5.758  |
| ILMN_1246609 | Rasgrp1       | 19419  | 0.423  |
| ILMN_1246821 | E130203B14Rik | 320736 | 1.689  |
| ILMN_1246861 | Ctss          | 13040  | 2.626  |
| ILMN_1247127 | B930075F07    |        | -2.928 |
| ILMN_1247348 | Ghr           |        | -2.309 |
| ILMN_1247377 | Mpeg1         | 17476  | 4.091  |
| ILMN_1247422 | Ces1b         | 382044 | -5.964 |
| ILMN_1247592 | Casp1         | 12362  | 5.709  |
| ILMN_1247704 | Hmgn3         | 94353  | 2.096  |
| ILMN_1248099 | Col16a1       | 107581 | 3.538  |
| ILMN_1248132 | Stmn1         |        | 5.361  |
| ILMN_1248415 | Tgoln1        | 22134  | -5.16  |
| ILMN_1248959 | Tinag         | 26944  | 4.384  |
| ILMN_1249021 | Bcl2          | 12043  | 4.036  |
| ILMN_1249220 | Col6a3        | 12835  | 1.868  |
| ILMN_1249246 | LOC384022     |        | -5.724 |
| ILMN_1249366 | LOC100046608  |        | 3.055  |
| ILMN_1249480 | 1300010F03Rik | 219189 | -3.987 |
| ILMN_1249486 | Mgl1          | 17312  | 1.605  |
| ILMN_1249498 | Plek          | 56193  | 3.115  |
| ILMN_1249578 | Sorl1         | 20660  | 4.016  |
| ILMN_1249666 | Ppap2c        | 50784  | 5.651  |
| ILMN_1249945 | 9930004G02Rik |        | -2.42  |
| ILMN_1250260 | Il10rb        | 16155  | 3.973  |
| ILMN_1250279 | Serpib6a      | 20719  | 4.723  |
| ILMN_1250438 | Marcks1       | 17357  | 3.194  |
| ILMN_1251098 | LOC671641     | 671641 | 4.24   |
| ILMN_1251390 | Tbxas1        | 21391  | 0.83   |
| ILMN_1251669 | Evi2a         | 14017  | 1.961  |
| ILMN_1251748 | Cytip         | 227929 | 2.256  |
| ILMN_1251837 | Slco1b2       | 28253  | -3.841 |
| ILMN_1252076 | Lyz2          | 17105  | 1.833  |
| ILMN_1252202 | Tnfaip3       | 21929  | 4.338  |
| ILMN_1252831 | 2310014H01Rik | 76448  | 2.716  |
| ILMN_1253233 | Dsg1c         |        | 3.302  |
| ILMN_1253563 | Cyp2d13       | 68444  | -4.903 |
| ILMN_1253741 | Pcolce        | 18542  | 4.392  |
| ILMN_1253808 | Oas1g         | 23960  | 2.129  |
| ILMN_1253813 | Nckap1l       | 105855 | 1.842  |



|              |                    |        |        |
|--------------|--------------------|--------|--------|
| ILMN_1253838 | Pawr               | 114774 | 3.64   |
| ILMN_1254721 | EG13909            | 13909  | -5.868 |
| ILMN_1254878 | Eif4e3             | 66892  | 3.193  |
| ILMN_1255871 | Loxl1              | 16949  | 1.79   |
| ILMN_1256142 | Marcks             | 17118  | 3.56   |
| ILMN_1256257 | LOC100038882       | 1E+08  | 1.281  |
| ILMN_1256423 | Ranbp3l            | 223332 | 0.606  |
| ILMN_1256725 | Acads              | 11409  | -3.788 |
| ILMN_1256817 | Slpi               | 20568  | 5.041  |
| ILMN_1257209 | Wipf1              | 215280 | 1.724  |
| ILMN_1257574 | Esm1               | 71690  | 5.821  |
| ILMN_1257575 | Cst3               | 13010  | 3.387  |
| ILMN_1257771 | LOC638301          | 638301 | 1.183  |
| ILMN_1258028 | Gal3st1            | 53897  | 4.73   |
| ILMN_1258283 | Ltb                | 16994  | 3.843  |
| ILMN_1258578 | Ahnak              | 66395  | 4.134  |
| ILMN_1258629 | Col3a1             | 12825  | 2.807  |
| ILMN_1258916 | Atp13a3            | 224088 | -2.959 |
| ILMN_1259035 | Wbscr14            |        | -2.79  |
| ILMN_1259388 | Col6a1             | 12833  | 1.772  |
| ILMN_1259400 | ENSMUSG00000043795 | 677289 | 2.59   |
| ILMN_1259470 | Tmem176b           | 65963  | 3.52   |
| ILMN_1259754 | Rnf4               | 19822  | -2.534 |
| ILMN_1259919 | 6332401O19Rik      | 319832 | 3.936  |
| ILMN_1260378 | Csrp1              | 13007  | 2.428  |
| ILMN_2416628 | Cyth4              | 72318  | 2.277  |
| ILMN_2418465 | Gnai2              | 14678  | 4.284  |
| ILMN_2418811 | 2200002D01Rik      |        | 2.704  |
| ILMN_2419998 | Soat1              | 20652  | 0.957  |
| ILMN_2423730 | A930008A22Rik      |        | 5.396  |
| ILMN_2424268 | Wtip               | 101543 | 3.871  |
| ILMN_2426853 | Ubd                | 24108  | 4.772  |
| ILMN_2427307 | Iqgap2             | 544963 | -4.192 |
| ILMN_2433990 | LOC100048346       |        | 1.545  |
| ILMN_2445658 | Igsf10             | 242050 | 0.327  |
| ILMN_2467596 | Dusp16             | 70686  | 3.108  |
| ILMN_2476733 | 1200016E24Rik      |        | 2.701  |
| ILMN_2479370 | Tm4sf4             | 229302 | 2.955  |
| ILMN_2483771 | C920027118Rik      |        | 3.644  |
| ILMN_2483948 | Specc1             | 432572 | 4.906  |
| ILMN_2484274 | 0610010E21Rik      | 68332  | 1.714  |
| ILMN_2484932 | C030002B11Rik      |        | 1.65   |
| ILMN_2485340 | 9530018I07Rik      |        | 2.923  |

|              |                 |        |        |
|--------------|-----------------|--------|--------|
| ILMN_2490548 | Tspan4          | 64540  | 1.74   |
| ILMN_2492170 | Tnfsf12-tnfsf13 | 619441 | 3.876  |
| ILMN_2494251 | Tuba1a          | 22142  | 5.833  |
| ILMN_2495446 | 0610037M15Rik   |        | 0.027  |
| ILMN_2501489 | Was             | 22376  | 1.371  |
| ILMN_2503188 | Ppl             | 19041  | 5.03   |
| ILMN_2503553 | Col8a1          | 12837  | 5.779  |
| ILMN_2505185 | LOC672274       | 672274 | 5.082  |
| ILMN_2505841 | Igsf4a          |        | 2.934  |
| ILMN_2511953 | Tnfaip8         | 106869 | 1.959  |
| ILMN_2514377 | Cxadr           |        | 2.889  |
| ILMN_2514522 | 4930533K18Rik   |        | 5.307  |
| ILMN_2515363 | Tpm4            | 326618 | 5.287  |
| ILMN_2526249 | LOC381269       |        | -4.864 |
| ILMN_2526851 | LOC227393       |        | -4.472 |
| ILMN_2528515 | LOC381448       |        | 3.667  |
| ILMN_2533766 | Ccdc109a        | 215999 | -3.114 |
| ILMN_2533952 | LOC237512       |        | 3.647  |
| ILMN_2534207 | LOC380706       |        | -0.149 |
| ILMN_2534783 | LOC245069       |        | -3.232 |
| ILMN_2538597 | LOC386405       |        | 2.816  |
| ILMN_2543688 | 0610007N19Rik   |        | 4.27   |
| ILMN_2548379 | 2210015K02Rik   |        | 5.608  |
| ILMN_2588055 | Actb            | 11461  | -1.939 |
| ILMN_2588759 | Aph1a           | 226548 | -3.53  |
| ILMN_2588995 | Rab8b           | 235442 | 3.886  |
| ILMN_2589024 | Plg             | 18815  | -4.073 |
| ILMN_2590950 | Agtrap          | 11610  | -1.853 |
| ILMN_2592239 | Pigp            | 56176  | 3.403  |
| ILMN_2592881 | Jam2            | 67374  | -0.264 |
| ILMN_2595612 | Idh2            | 269951 | 4.567  |
| ILMN_2596611 | Clic1           |        | 3.38   |
| ILMN_2596961 | D430028G21Rik   | 228607 | -5.069 |
| ILMN_2598103 | Emp2            | 13731  | 5.552  |
| ILMN_2601072 | Dab1            | 13131  | 4.986  |
| ILMN_2601515 | Bpnt1           |        | -4.29  |
| ILMN_2602858 | Prickle3        | 54630  | 5.151  |
| ILMN_2603568 | Obrgrp          |        | 2.711  |
| ILMN_2606162 | Pdlim4          | 30794  | 2.985  |
| ILMN_2609323 | Lst1            |        | 1.252  |
| ILMN_2609998 | Fxyd6           | 59095  | 3.745  |
| ILMN_2611180 | Ccdc3           |        | 2.613  |
| ILMN_2611755 | Serpinb6b       | 20708  | 5.787  |

|              |           |        |        |
|--------------|-----------|--------|--------|
| ILMN_2612738 | Coq5      | 52064  | -4.226 |
| ILMN_2614313 | Lin7a     | 108030 | -4.4   |
| ILMN_2614380 | Map3k1    | 26401  | 4.622  |
| ILMN_2615468 | Fgfr1op2  | 67529  | 0.806  |
| ILMN_2618176 | Socs3     | 12702  | 4.018  |
| ILMN_2618634 | Spna2     |        | 4.732  |
| ILMN_2619107 | Lgals1    |        | 5.055  |
| ILMN_2619620 | C1qb      | 12260  | 1.231  |
| ILMN_2620053 | Als2      | 74018  | -3.718 |
| ILMN_2622671 | Acs1      | 14081  | -4.529 |
| ILMN_2623280 | Osmr      | 18414  | 4.271  |
| ILMN_2625351 | Sh3bgrl3  | 73723  | 4.23   |
| ILMN_2625940 | Neurl     |        | 5.743  |
| ILMN_2626294 | Pam       | 18484  | 1.982  |
| ILMN_2627041 | Cx3cl1    | 20312  | 5.414  |
| ILMN_2627557 | Tbc1d19   | 67249  | 5.152  |
| ILMN_2628594 | Mtttp     | 17777  | -4.842 |
| ILMN_2629112 | Asah3l    | 230379 | -2.443 |
| ILMN_2630047 | Car3      | 12350  | -3.851 |
| ILMN_2630946 | Aprt      |        | 4.614  |
| ILMN_2631161 | Fcgr4     | 246256 | -0.535 |
| ILMN_2633096 | Gstm6     | 14867  | -0.124 |
| ILMN_2634603 | LOC56628  | 56628  | 0.251  |
| ILMN_2635272 | Igh-VJ558 | 16061  | 1.914  |
| ILMN_2635813 | Nudt12    | 67993  | -3.56  |
| ILMN_2635895 | Plscr2    | 18828  | 4.546  |
| ILMN_2636424 | Itgbl1    | 223272 | 2.594  |
| ILMN_2637792 | Cryz      | 12972  | -3.014 |
| ILMN_2639036 | Hspd1     | 15510  | -3.487 |
| ILMN_2642913 | Emp1      | 13730  | 3.584  |
| ILMN_2642922 | Mtmr11    | 194126 | 3.485  |
| ILMN_2643092 | Rps9      | 76846  | 5.048  |
| ILMN_2644350 | Thy1      | 21838  | 4.731  |
| ILMN_2645662 | Tmem86a   | 67893  | 2.058  |
| ILMN_2645973 | Tff3      | 21786  | 3.843  |
| ILMN_2648409 | Cmtm7     | 102545 | 3.061  |
| ILMN_2648445 | Slc27a2   | 26458  | -3.824 |
| ILMN_2650115 | Adamts12  | 77794  | -0.423 |
| ILMN_2651076 | Scotin    | 66940  | 2.828  |
| ILMN_2651715 | Axl       | 26362  | 1.467  |
| ILMN_2653132 | Clec7a    | 56644  | 3.682  |
| ILMN_2653166 | Gpx8      | 69590  | 1.897  |
| ILMN_2654186 | Nedd9     | 18003  | 5.244  |

|              |               |        |        |
|--------------|---------------|--------|--------|
| ILMN_2654495 | Iqgap1        |        | 3.663  |
| ILMN_2654554 | Fgl2          | 14190  | 1.417  |
| ILMN_2654754 | Gp38          |        | 2.409  |
| ILMN_2656422 | BC028528      | 229600 | 1.971  |
| ILMN_2657478 | Cd53          | 12508  | 1.878  |
| ILMN_2657685 | Aass          | 30956  | -5.074 |
| ILMN_2658130 | Hkdc1         | 216019 | 1.131  |
| ILMN_2658501 | Ifitm3        | 66141  | 0.81   |
| ILMN_2658804 | Rras          | 20130  | 4.807  |
| ILMN_2658815 | Tmem98        | 103743 | 2.964  |
| ILMN_2659426 | Cxcl14        |        | 2.742  |
| ILMN_2659824 | Ppp1r14a      | 68458  | 0.88   |
| ILMN_2659997 | Acaa1b        | 235674 | -3.436 |
| ILMN_2660263 | Bcl2a1b       | 12045  | 3.341  |
| ILMN_2660551 | Lat           | 16797  | 3.22   |
| ILMN_2660555 | Bcl2a1d       |        | 3.38   |
| ILMN_2660862 | Sepn1         | 74777  | 3.783  |
| ILMN_2661576 | Bicc1         | 83675  | 5.269  |
| ILMN_2663130 | P2ry6         | 233571 | 2.603  |
| ILMN_2663249 | Slamf9        | 98365  | 4.587  |
| ILMN_2663585 | Jdp2          | 81703  | 3.632  |
| ILMN_2665008 | Rab31         | 106572 | 2.426  |
| ILMN_2665307 | Pilra         | 231805 | -0.481 |
| ILMN_2665629 | Ldhd          | 52815  | -5.361 |
| ILMN_2666018 | Mgp           | 17313  | 2.548  |
| ILMN_2667091 | Ppp1r3c       | 53412  | -5.686 |
| ILMN_2669289 | Htra4         | 330723 | -2.121 |
| ILMN_2670038 | Cdh16         | 12556  | 0.65   |
| ILMN_2671195 | St8sia4       | 20452  | 4.442  |
| ILMN_2671923 | Ly86          | 17084  | 2.452  |
| ILMN_2673369 | Irf8          | 15900  | 1.711  |
| ILMN_2673668 | LOC624662     | 624662 | 5.292  |
| ILMN_2673917 | 2810022L02Rik | 67198  | 2.364  |
| ILMN_2674122 | Pkia          | 18767  | 5.586  |
| ILMN_2674281 | LOC100045343  | 1E+08  | 4.673  |
| ILMN_2674483 | Gpx2          | 14776  | 5.606  |
| ILMN_2675669 | Cd72          | 12517  | 1.868  |
| ILMN_2678019 | Psmd8         | 57296  | 2.267  |
| ILMN_2680142 | Anxa5         | 11747  | 4.018  |
| ILMN_2681232 | D12Ertd647e   | 52668  | 1.439  |
| ILMN_2684370 | Igk-C         |        | 1.307  |
| ILMN_2684600 | Nalp6         |        | -3.094 |
| ILMN_2685234 | Hsd17b11      | 114664 | -3.196 |

|              |               |        |        |
|--------------|---------------|--------|--------|
| ILMN_2685565 | Tymp          | 72962  | -5.213 |
| ILMN_2686327 | Gas6          | 14456  | 4.1    |
| ILMN_2686393 | Gna12         | 14673  | -3.618 |
| ILMN_2686700 | Abca8a        | 217258 | -5.309 |
| ILMN_2686975 | Fam129b       | 227737 | 4.758  |
| ILMN_2687403 | Fcgr3         | 14131  | 1.212  |
| ILMN_2687586 | Cxcl16        | 66102  | 3.959  |
| ILMN_2689785 | Cd68          | 12514  | 0.794  |
| ILMN_2690603 | Spp1          | 20750  | 3.973  |
| ILMN_2692615 | Tgm2          | 21817  | 5.088  |
| ILMN_2692986 | 2810410P22Rik |        | -2.496 |
| ILMN_2693403 | Ela1          | 109901 | -2.01  |
| ILMN_2695008 | Ncoa4         |        | -4.425 |
| ILMN_2695819 | Ddit4l        | 73284  | 1.494  |
| ILMN_2696199 | Prosc         |        | -3.473 |
| ILMN_2696232 | Nme5          | 75533  | 3.642  |
| ILMN_2696491 | Phf11         | 219131 | 0.839  |
| ILMN_2699222 | LOC669053     | 669053 | 0.849  |
| ILMN_2699531 | Rgs10         | 67865  | 4.475  |
| ILMN_2699880 | Abca9         | 217262 | -4.932 |
| ILMN_2700715 | Cstb          | 13014  | 4.861  |
| ILMN_2702703 | Shmt2         | 108037 | -4.522 |
| ILMN_2704562 | LOC100047628  |        | 1.168  |
| ILMN_2704822 | Acaa2         |        | -4.022 |
| ILMN_2705460 | Ntrk2         | 18212  | 1.781  |
| ILMN_2705777 | Gstm5         | 14866  | 4.535  |
| ILMN_2705848 | Decr2         |        | -4.707 |
| ILMN_2706268 | Scara3        | 219151 | 1.128  |
| ILMN_2708477 | Spink3        |        | 4.289  |
| ILMN_2708928 | Bdh1          | 71911  | -2.546 |
| ILMN_2710185 | Mylc2b        | 67938  | 3.784  |
| ILMN_2710819 | Csf1r         | 12978  | 1.338  |
| ILMN_2710905 | S100a8        | 20201  | 1.774  |
| ILMN_2711163 | Ctsk          | 13038  | 3.346  |
| ILMN_2711267 | Krt18         | 16668  | 5.885  |
| ILMN_2712075 | Lcn2          | 16819  | 3.609  |
| ILMN_2712120 | S100a6        | 20200  | 5.528  |
| ILMN_2712578 | Rbm47         | 245945 | -3.238 |
| ILMN_2713055 | Psca          | 72373  | 5.428  |
| ILMN_2713969 | B9d1          | 27078  | 5.686  |
| ILMN_2714787 | 1110038B12Rik | 68763  | 3.505  |
| ILMN_2714796 | Coro1a        | 12721  | 3.056  |
| ILMN_2715270 | Slc5a1        | 20537  | 5.118  |

|              |           |        |        |
|--------------|-----------|--------|--------|
| ILMN_2715840 | C1qc      | 12262  | 0.473  |
| ILMN_2716389 | Smpd3     | 58994  | 3.028  |
| ILMN_2717439 | Pip4k2a   | 18718  | 1.344  |
| ILMN_2718217 | Tubb6     | 67951  | 5.577  |
| ILMN_2720047 | AW124722  |        | -4.208 |
| ILMN_2722732 | Srgn      | 19073  | 2.11   |
| ILMN_2722784 | Cd3g      | 12502  | 2.36   |
| ILMN_2722893 | LOC637227 | 637227 | 0.909  |
| ILMN_2722996 | Sirpa     | 19261  | 3.958  |
| ILMN_2723369 | Npal2     | 223473 | 2.214  |
| ILMN_2724294 | Gpx7      | 67305  | 5.625  |
| ILMN_2725414 | Cd9       |        | 3.26   |
| ILMN_2725927 | Serpina3g | 20715  | -0.58  |
| ILMN_2726055 | Shmt1     |        | -5.394 |
| ILMN_2727116 | Sox4      | 20677  | 5.063  |
| ILMN_2727251 | Slc4a9    | 240215 | 1.209  |
| ILMN_2728379 | Ivd       | 56357  | -4.587 |
| ILMN_2728796 | C1rl      | 232371 | -5.932 |
| ILMN_2729458 | Idh1      | 15926  | -4.473 |
| ILMN_2730100 | Cib3      | 234421 | 2.457  |
| ILMN_2730797 | Slc25a10  | 27376  | -3.904 |
| ILMN_2731020 | Sult5a1   | 57429  | -3.922 |
| ILMN_2731454 | Evl       | 14026  | 1.416  |
| ILMN_2731550 | Brp17     |        | -5.14  |
| ILMN_2731760 | Myo1f     | 17916  | 2.456  |
| ILMN_2731949 | Klf6      | 23849  | 4.744  |
| ILMN_2732848 | Tagln2    | 21346  | 4.647  |
| ILMN_2733356 | Endod1    | 71946  | 4.452  |
| ILMN_2734340 | Stx11     | 74732  | 2.375  |
| ILMN_2734683 | Fstl1     | 14314  | 2.645  |
| ILMN_2734729 | H2-Aa     | 14960  | 3.797  |
| ILMN_2736539 | Cyp2c55   | 72082  | -3.055 |
| ILMN_2739760 | Prelp     | 116847 | 3.152  |
| ILMN_2740465 | Il1rap    | 16180  | -5.55  |
| ILMN_2740852 | F2r       | 14062  | 4.309  |
| ILMN_2740965 | Prss8     | 76560  | 5.543  |
| ILMN_2741096 | Timp3     | 21859  | 3.896  |
| ILMN_2741169 | Cd8b1     | 12526  | 2.9    |
| ILMN_2742075 | Cd14      | 12475  | 3.762  |
| ILMN_2743013 | Ncf4      | 17972  | 1.612  |
| ILMN_2743244 | Cd86      | 12524  | 0.012  |
| ILMN_2744380 | Npc2      | 67963  | 3.192  |
| ILMN_2744514 | Veph1     | 72789  | 5.057  |

|              |               |        |        |
|--------------|---------------|--------|--------|
| ILMN_2746086 | Tax1bp3       | 76281  | 5.21   |
| ILMN_2746556 | Dkk3          | 50781  | 0.859  |
| ILMN_2746811 | Gpr108        | 78308  | -3.835 |
| ILMN_2746895 | Gpr120        | 107221 | 5.147  |
| ILMN_2749747 | 2410004L22Rik | 76478  | 5.311  |
| ILMN_2749840 | Slc47a1       | 67473  | -5.209 |
| ILMN_2749842 | 1300013J15Rik | 67473  | -5.232 |
| ILMN_2749958 | LOC676420     | 676420 | 3.479  |
| ILMN_2750047 | Csf2rb2       | 12984  | 0.752  |
| ILMN_2750548 | Gnpda1        |        | -4.923 |
| ILMN_2754690 | Acad8         | 66948  | -4.526 |
| ILMN_2755660 | LOC100044779  | 1E+08  | 4.706  |
| ILMN_2756041 | Pkm2          | 18746  | 2.339  |
| ILMN_2757232 | Aqp4          | 11829  | -2.809 |
| ILMN_2757807 | BC031353      | 235493 | -4.18  |
| ILMN_2757966 | Cxcl4         | 56744  | 1.979  |
| ILMN_2758029 | Prtn3         | 19152  | 1.477  |
| ILMN_2758878 | Tmem66        | 67887  | -3.469 |
| ILMN_2759309 | Rnase6        | 78416  | 2.312  |
| ILMN_2759344 | LOC100048733  | 1E+08  | 2.915  |
| ILMN_2760105 | Olig1         | 50914  | 0.18   |
| ILMN_2760979 | Tgfbr2        | 21813  | 4.694  |
| ILMN_2762944 | Ifi27         | 76933  | 1.076  |
| ILMN_2764466 | Capsl         | 75568  | 2.635  |
| ILMN_2764588 | Igfbp7        | 29817  | 3.092  |
| ILMN_2769567 | F2rl1         |        | 5.525  |
| ILMN_2769777 | Msc           | 17681  | 1.081  |
| ILMN_2770066 | LOC100044439  |        | 3.09   |
| ILMN_2771034 | Mfge8         |        | 5.463  |
| ILMN_2771182 | H2-Q8         |        | -0.248 |
| ILMN_2771641 | Aldh8a1       | 237320 | -4.988 |
| ILMN_2772077 | Bok           |        | 3.879  |
| ILMN_2773113 | Capg          | 12332  | 3.527  |
| ILMN_2773259 | Lum           |        | -0.049 |
| ILMN_2774507 | E430002G05Rik |        | 0.907  |
| ILMN_2774572 | Crygn         |        | 0.194  |
| ILMN_2775660 | Myl6          |        | 3.843  |
| ILMN_2776087 | Rab25         | 53868  | 0.006  |
| ILMN_2776278 | Ly6e          |        | 1.955  |
| ILMN_2776419 | Dncl1         |        | 5.564  |
| ILMN_2776431 | C1qa          | 12259  | 1.102  |
| ILMN_2777359 | Serpinh1      |        | 2.384  |
| ILMN_2777462 | Pnpla3        | 116939 | 5.16   |

|              |               |        |        |
|--------------|---------------|--------|--------|
| ILMN_2777769 | H2-DMa        | 14998  | 3.043  |
| ILMN_2778151 | Sox9          |        | 4.628  |
| ILMN_2778655 | Vcam1         | 22329  | 1.788  |
| ILMN_2781030 | Napsa         | 16541  | 2.706  |
| ILMN_2789294 | Tmem25        | 71687  | -3.905 |
| ILMN_2789948 | Arhgdib       | 11857  | 1.611  |
| ILMN_2790373 | Snn           | 20621  | 5.327  |
| ILMN_2791028 | App           | 11820  | 4.958  |
| ILMN_2791665 | Agxt2         | 268782 | -3.889 |
| ILMN_2793522 | Tnfrsf19      | 29820  | 3.735  |
| ILMN_2794645 | Cyr61         | 16007  | 4.788  |
| ILMN_2795106 | Cyp1a2        | 13077  | -3.581 |
| ILMN_2795412 | Tmem176a      | 66058  | 2.97   |
| ILMN_2800813 | Cabc1         | 67426  | -3.573 |
| ILMN_2801891 | Cygb          | 114886 | 1.144  |
| ILMN_2803674 | S100a9        | 20202  | 1.821  |
| ILMN_2804444 | Pcdh17        | 219228 | 3.371  |
| ILMN_2804487 | Aif1          | 11629  | 1.498  |
| ILMN_2806159 | Tmsb4x        | 19241  | 3.291  |
| ILMN_2806439 | Slc17a8       | 216227 | -2.374 |
| ILMN_2806700 | Cyba          | 13057  | 1.833  |
| ILMN_2808811 | Gpd1          | 14555  | -2.138 |
| ILMN_2810882 | Ppic          | 19038  | 3.418  |
| ILMN_2812926 | Slc30a10      | 226781 | -5.328 |
| ILMN_2814005 | Nid1          | 18073  | 4.919  |
| ILMN_2814974 | Klra2         | 16633  | 0.547  |
| ILMN_2815626 | Palm          | 18483  | 5.053  |
| ILMN_2816180 | Lbh           | 77889  | 0.835  |
| ILMN_2819558 | Bach2         | 12014  | -3.618 |
| ILMN_2820893 | Selplg        | 20345  | 2.411  |
| ILMN_2821460 | Ptpn18        | 19253  | 2.292  |
| ILMN_2821850 | Nampt         | 59027  | 3.585  |
| ILMN_2827081 | Sgk2          | 27219  | -2.032 |
| ILMN_2830666 | 9130409I23Rik | 619326 | -3.956 |
| ILMN_2831283 | Tmem43        | 74122  | 4.321  |
| ILMN_2831669 | EG240549      | 240549 | -4.099 |
| ILMN_2833163 | BC064033      | 208164 | 0.599  |
| ILMN_2834379 | Tgfb1         | 21810  | 0.159  |
| ILMN_2837189 | 6720467C03Rik | 68099  | 3.72   |
| ILMN_2837671 | Fblim1        | 74202  | 2.012  |
| ILMN_2838317 | Pqlc3         | 217430 | 4.973  |
| ILMN_2844829 | Prodh2        | 56189  | -3.063 |
| ILMN_2845214 | Lrpprc        | 72416  | -4.778 |



|              |                    |        |        |
|--------------|--------------------|--------|--------|
| ILMN_2850233 | Elf3               | 13710  | 4.033  |
| ILMN_2851671 | Myadm              | 50918  | 3.974  |
| ILMN_2857957 | Mgll               | 23945  | -4.02  |
| ILMN_2860479 | Arpc1b             | 11867  | 3.402  |
| ILMN_2864309 | OTTMUSG00000000971 |        | -1.589 |
| ILMN_2864416 | Rtp3               | 235636 | -3.782 |
| ILMN_2866901 | Efemp2             | 58859  | 1.938  |
| ILMN_2867147 | Tyrobp             | 22177  | 1.795  |
| ILMN_2870672 | Fbln1              | 14114  | 1.031  |
| ILMN_2871628 | Mapk8ip1           | 19099  | 4.472  |
| ILMN_2873750 | Gldc               | 104174 | -2.895 |
| ILMN_2874853 | Eef1b2             | 55949  | 3.147  |
| ILMN_2878071 | Lyz                | 17110  | 3.01   |
| ILMN_2879588 | Lhfp               | 108927 | 2.156  |
| ILMN_2885532 | Cpt2               | 12896  | -5.177 |
| ILMN_2886896 | 4632417N05Rik      | 74032  | -5.072 |
| ILMN_2888191 | Ccr5               | 12774  | 0.227  |
| ILMN_2888940 | 1810033M07Rik      | 69187  | -4.617 |
| ILMN_2890357 | 2610027C15Rik      | 230752 | -0.142 |
| ILMN_2894678 | H2-T10             | 15024  | -2.883 |
| ILMN_2896601 | Icam1              | 15894  | 5.224  |
| ILMN_2896768 | Cbr3               | 109857 | 4.213  |
| ILMN_2901626 | Tnfrsf21           | 94185  | -1.831 |
| ILMN_2909150 | Ctgf               | 14219  | 3.858  |
| ILMN_2910295 | Crim1              | 50766  | 3.805  |
| ILMN_2910934 | Cd52               | 23833  | 2.594  |
| ILMN_2911344 | Plscr1             | 22038  | 4.902  |
| ILMN_2913590 | Lonp2              | 66887  | -4.918 |
| ILMN_2914744 | Hn1                | 15374  | 5.01   |
| ILMN_2915232 | Cotl1              | 72042  | 1.859  |
| ILMN_2923607 | Phlda3             | 27280  | 5.507  |
| ILMN_2924505 | Gys2               | 232493 | -4.931 |
| ILMN_2925281 | Abcd3              | 19299  | -3.699 |
| ILMN_2925947 | Abat               | 268860 | -5.213 |
| ILMN_2932164 | Notum              | 77583  | -2.279 |
| ILMN_2933887 | 1200013B08Rik      | 74131  | 1.744  |
| ILMN_2939503 | Ttc39a             | 230603 | 1.974  |
| ILMN_2939681 | Lyzs               | 17105  | 3.039  |
| ILMN_2941728 | Nenf               | 66208  | 5.38   |
| ILMN_2941790 | Cldn6              | 54419  | 1.387  |
| ILMN_2943599 | Ngfrap1            | 12070  | 4.785  |
| ILMN_2950286 | Ankrd1             | 107765 | 5.707  |
| ILMN_2951682 | Cobl               | 12808  | 2.669  |

|              |                    |        |        |
|--------------|--------------------|--------|--------|
| ILMN_2954575 | Arhgap30           | 226652 | 1.771  |
| ILMN_2954868 | Oasl2              | 23962  | 1.973  |
| ILMN_2959372 | Clec4b1            | 69810  | 2.342  |
| ILMN_2960044 | Cyp4a31            | 545670 | -3.413 |
| ILMN_2964042 | Bgn                | 12111  | 0.611  |
| ILMN_2964185 | H2-M2              | 14990  | 4.798  |
| ILMN_2965613 | Abca6              | 76184  | -5.384 |
| ILMN_2967266 | Fxyd5              | 18301  | 3.634  |
| ILMN_2971688 | Nrg1               | 211323 | 4.334  |
| ILMN_2971816 | Gltp               | 56356  | 2.583  |
| ILMN_2973156 | Esrrg              | 26381  | -2.829 |
| ILMN_2973824 | Car14              | 23831  | -3.596 |
| ILMN_2976159 | Mreg               | 381269 | -5.561 |
| ILMN_2976211 | Cyp2b23            | 243881 | -3.787 |
| ILMN_2981169 | Ifit2              | 15958  | 4.485  |
| ILMN_2983516 | Slc11a1            | 18173  | -0.727 |
| ILMN_2984744 | Emp3               | 13732  | 1.926  |
| ILMN_2986051 | Ccbl1              | 70266  | -4.663 |
| ILMN_2987599 | AI317395           | 215929 | -5.772 |
| ILMN_2987709 | Slc15a3            | 65221  | -0.581 |
| ILMN_2988143 | Plac8              | 231507 | 0.478  |
| ILMN_2992232 | Mlxipl             | 58805  | -1.723 |
| ILMN_2993314 | Clec4n             | 56620  | 2.109  |
| ILMN_2994299 | Hgfac              | 54426  | -4.257 |
| ILMN_2999329 | Serpina5           | 268591 | 0.017  |
| ILMN_3000236 | F11                | 109821 | -4.447 |
| ILMN_3006219 | Fyb                | 23880  | 1.148  |
| ILMN_3008361 | Bmper              | 73230  | 1.24   |
| ILMN_3009910 | Rbm13              | 67920  | 2.722  |
| ILMN_3033562 | OTTMUSG00000017677 | 574404 | 2.082  |
| ILMN_3040693 | Lamc3              | 23928  | 4.131  |
| ILMN_3046836 | Suclg2             | 20917  | -3.495 |
| ILMN_3054840 | AW061290           | 381110 | -3.904 |
| ILMN_3061070 | Slc25a20           | 57279  | -4.265 |
| ILMN_3062267 | Acot1              | 26897  | -0.989 |
| ILMN_3067068 | Tmsb10             | 19240  | 3.81   |
| ILMN_3070469 | Entpd5             | 12499  | -4.057 |
| ILMN_3079257 | Mup5               | 17844  | -5.08  |
| ILMN_3091003 | Ms4a7              | 109225 | 5.49   |
| ILMN_3100812 | Gpx4               | 625249 | 3.656  |
| ILMN_3103896 | Timp1              | 21857  | 4.894  |
| ILMN_3107059 | Espn               | 56226  | 4.766  |
| ILMN_3114124 | Hsd3b7             | 101502 | -4.573 |

|              |          |        |        |
|--------------|----------|--------|--------|
| ILMN_3117876 | Chi3l3   | 12655  | 1.781  |
| ILMN_3118707 | Sla      | 20491  | 1.915  |
| ILMN_3120510 | Gvin1    | 74558  | 2.462  |
| ILMN_3131679 | Usp18    | 24110  | 2.427  |
| ILMN_3139405 | Hbs1l    | 56422  | -4.753 |
| ILMN_3141801 | Wfdc15b  | 192201 | 1.919  |
| ILMN_3151149 | Cpne8    | 66871  | 4.172  |
| ILMN_3152506 | Atp11c   | 320940 | -3.922 |
| ILMN_3158499 | Mdk      | 17242  | 1.533  |
| ILMN_3158698 | BC046404 | 192976 | 4.558  |
| ILMN_3161652 | Clec4a3  | 73149  | 0.224  |

---

**Supplementary Table 2. Functional categories of genes in the SOH signature**

| <b>Functional Category</b>             | <b>P-values*</b>       |
|----------------------------------------|------------------------|
| Cellular Movement                      | $5.41 \times 10^{-21}$ |
| Cellular Growth and Proliferation      | $7.00 \times 10^{-19}$ |
| Cell-To-Cell Signaling and Interaction | $4.80 \times 10^{-18}$ |
| Cellular Function and Maintenance      | $7.61 \times 10^{-18}$ |
| Cell Death and Survival                | $1.31 \times 10^{-13}$ |
| Cellular Development                   | $6.02 \times 10^{-13}$ |
| Lipid Metabolism                       | $3.43 \times 10^{-11}$ |
| Small Molecule Biochemistry            | $3.43 \times 10^{-11}$ |
| Free Radical Scavenging                | $2.14 \times 10^{-9}$  |
| Protein Synthesis                      | $2.80 \times 10^{-7}$  |
| Cellular Compromise                    | $1.18 \times 10^{-6}$  |
| Cellular Assembly and Organization     | $1.84 \times 10^{-6}$  |
| Cell Signaling                         | $2.44 \times 10^{-6}$  |
| Post-Translational Modification        | $7.99 \times 10^{-6}$  |
| Amino Acid Metabolism                  | $1.11 \times 10^{-5}$  |
| Molecular Transport                    | $1.39 \times 10^{-5}$  |
| Protein Trafficking                    | $3.72 \times 10^{-5}$  |
| Vitamin and Mineral Metabolism         | $9.46 \times 10^{-5}$  |
| Protein Folding                        | $1.68 \times 10^{-4}$  |
| Cell Cycle                             | $1.71 \times 10^{-4}$  |

\* Fisher's Exact Test

Functional category was defined by Ingenuity Knowledge Base database.

**Supplementary Table 3. Significant associations between the SOH subtype with YAP1 protein expression in HCC.**

| <b>YAP1 expression</b> | <b>SOH</b> | <b>AH</b> | <b>Total</b> |
|------------------------|------------|-----------|--------------|
| <b>High</b>            | 6          | 13        | 19           |
| <b>Low</b>             | 0          | 13        | 13           |
| <b>Total</b>           | 6          | 26        | 32           |

$P = 0.02$  by  $\chi^2$ -test

**Supplementary Table 4. Characteristics of HCC patients in MSH cohort stratified by SOH signature.**

| Characteristics        | SOH | AH | Total | P-value*               |
|------------------------|-----|----|-------|------------------------|
|                        | 22  | 69 | 91    |                        |
| <i>CTNNB1</i> mutation |     |    |       | 0.02                   |
| yes                    | 2   | 25 | 27    |                        |
| no                     | 18  | 42 | 60    |                        |
| ND                     | 2   | 2  | 4     |                        |
| pAKT staining          |     |    |       | 0.017                  |
| positive               | 11  | 16 | 27    |                        |
| negative               | 10  | 49 | 59    |                        |
| ND                     | 1   | 4  | 5     |                        |
| pIGFR1 staining        |     |    |       | 0.019                  |
| positive               | 8   | 8  | 16    |                        |
| negative               | 13  | 49 | 62    |                        |
| ND                     | 0   | 13 | 13    |                        |
| pS6 staining           |     |    |       | 1.4 x 10 <sup>-4</sup> |
| positive               | 18  | 22 | 40    |                        |
| negative               | 4   | 41 | 45    |                        |
| ND                     | 0   | 6  | 6     |                        |

\* $\chi^2$ -test

**ND**, not determined

**SOH**, silence of Hippo pathway

**AH**, active Hippo pathway
